# Supplementary material for: Sweeteners Show a Plasticizing Effect on PVP K30—A Solution for the Hot-Melt Extrusion of Fixed-Dose Amorphous Curcumin-Hesperetin Solid Dispersions
Source: MDPI journal article supplement (doi:10.3390/pharmaceutics16050659), 2024-05-15
Supplement: s1 [file s1]

## Article

# Sweeteners Show a Plasticizing Effect on PVP K30—A Solution for the Hot-Melt Extrusion of Fixed-Dose Amorphous Curcumin-Hesperetin Solid Dispersions

Kamil Wdowiak <sup>1</sup>, Lidia Tajber <sup>2</sup>, Andrzej Miklaszewski <sup>3</sup> and Judyta Cielecka-Piontek <sup>1,\*</sup>

<sup>1</sup> Department of Pharmacognosy and Biomaterials, Poznan University of Medical Sciences, 3 Rokietnicka St., 60-806 Poznan, Poland; kamil.wdowiak@student.ump.edu.pl

<sup>2</sup> School of Pharmacy and Pharmaceutical Sciences, Trinity College Dublin, University of Dublin, D02 PN40 Dublin, Ireland; ltajber@tcd.ie

<sup>3</sup> Institute of Materials Science and Engineering, Poznan University of Technology, Jana Pawla II 24, 61-138 Poznan, Poland; andrzej.miklaszewski@put.poznan.pl

\* Correspondence: jpiontek@ump.edu.pl

## Chromatographic conditions:

- Stationary phase - Dr. Maisch ReproSil-Pur Basic-C18 100 Å column, 5 µm particle size, 250 × 4.60 mm
- Mobile phase - methanol/0.1% acetic acid (80:20 v/v)
- Column temperature - 30 °C
- Flow rate - 1.0 mL/min

**Citation:** Wdowiak, K.; Tajber, L.; Miklaszewski, A.; Cielecka-Piontek, J. Sweeteners Show a Plasticizing Effect on PVP K30—A Solution for the Hot-Melt Extrusion of Fixed-Dose Amorphous Curcumin-Hesperetin Solid Dispersions. *Pharmaceutics* **2024**, *16*, 659. <https://doi.org/10.3390/pharmaceutics16050659>

Academic Editor: Ecevit Bilgili

Received: 22 April 2024

Revised: 8 May 2024

Accepted: 13 May 2024

Published: 15 May 2024

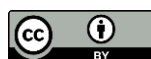

**Copyright:** © 2024 by the author. Licensee MDPI, Basel, Switzerland. This article is an open access article distributed under the terms and conditions of the Creative Commons Attribution (CC BY) license (<https://creativecommons.org/licenses/by/4.0/>).

**Table S1.** HPLC method validation parameters.

| Curcumin                    |                                                            |
|-----------------------------|------------------------------------------------------------|
| Parameter                   | Curcumin dissolved in methanol<br>Injection volume 10 µl   |
| Linearity range (mg/mL)     | 0.00004 – 0.2                                              |
| Correlation coefficient (r) | 0.9995                                                     |
| a ± S <sub>a</sub>          | 85245719 ± 2049391                                         |
| b ± S <sub>b</sub>          | insignificant (α=0.05)                                     |
| LOD (mg/mL)                 | 0.0083                                                     |
| LOQ (mg/mL)                 | 0.025                                                      |
| Retention Time              | 6.644                                                      |
| Hesperetin                  |                                                            |
| Parameter                   | Hesperetin dissolved in methanol<br>Injection volume 10 µl |
| Linearity range (mg/mL)     | 0.00003 – 0.3                                              |
| Correlation coefficient (r) | 0.9999                                                     |
| a ± S <sub>a</sub>          | 80201208 ± 341776                                          |
| b ± S <sub>b</sub>          | insignificant (α=0.05)                                     |
| LOD (mg/mL)                 | 0.0022                                                     |
| LOQ (mg/mL)                 | 0.0068                                                     |
| Retention Time (min)        | 4.221                                                      |

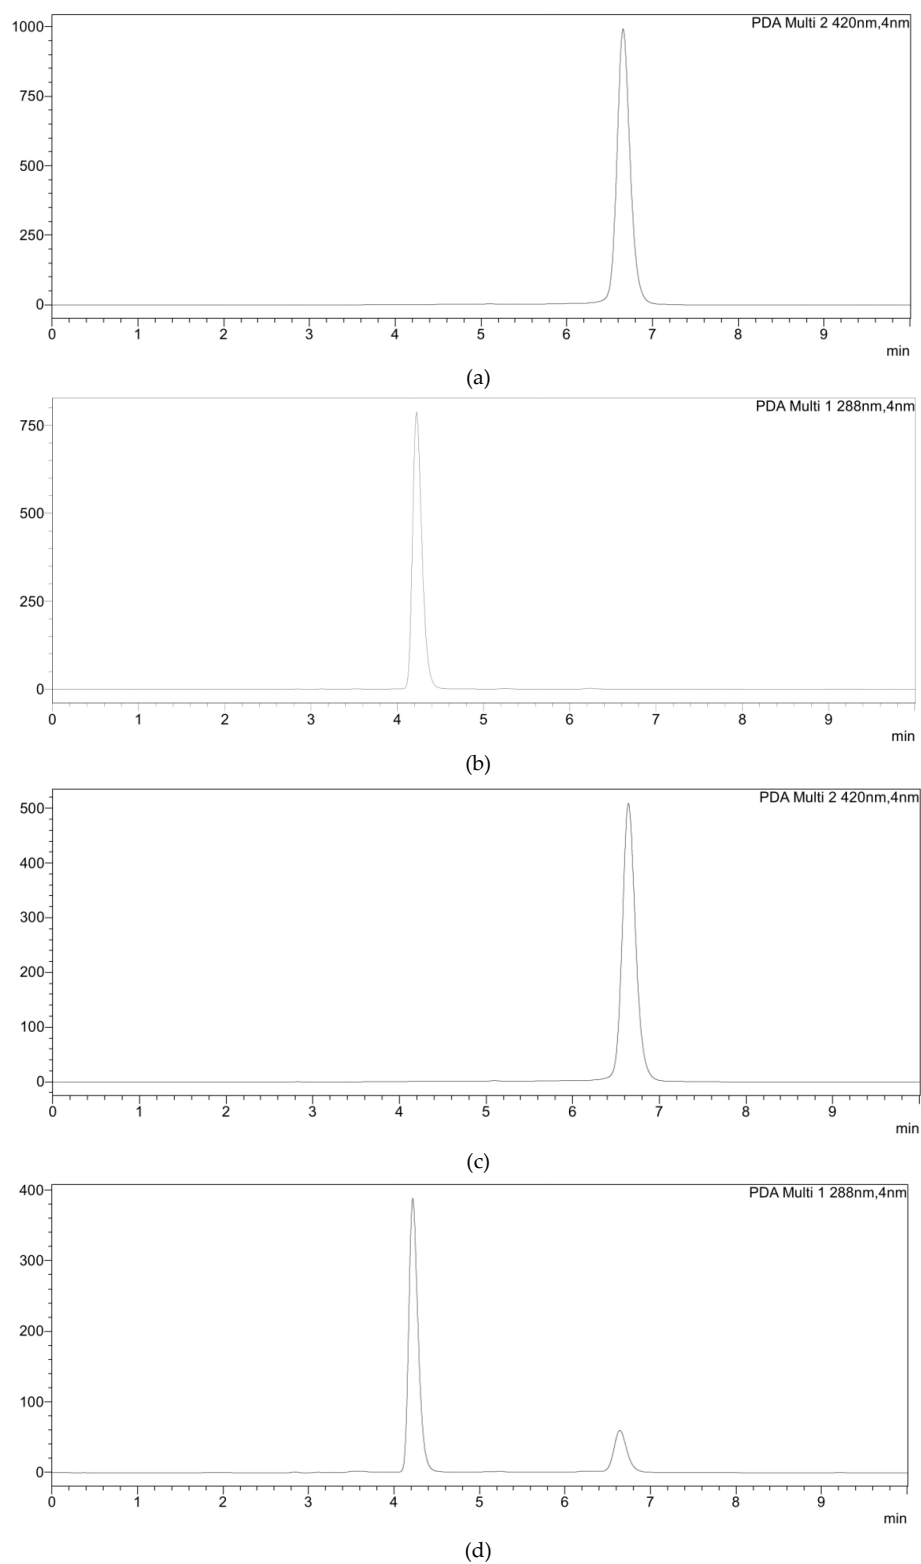

**Figure S1.** Chromatograms of standards and systems, curcumin standard (a), hesperetin standard (b), system 420 nm (c), system 288 nm (d).

**Disclaimer/Publisher's Note:** The statements, opinions and data contained in all publications are solely those of the individual author(s) and contributor(s) and not of MDPI and/or the editor(s). MDPI and/or the editor(s) disclaim responsibility for any injury to people or property resulting from any ideas, methods, instructions or products referred to in the content.
